# Supplementary material for: Recovery of Hydrochloric Acid from Industrial Wastewater by Diffusion Dialysis Using a Spiral-Wound Module
Source: MDPI journal article supplement (doi:10.3390/ijms23116212), 2022-06-01
Supplement: s1 [file s1]

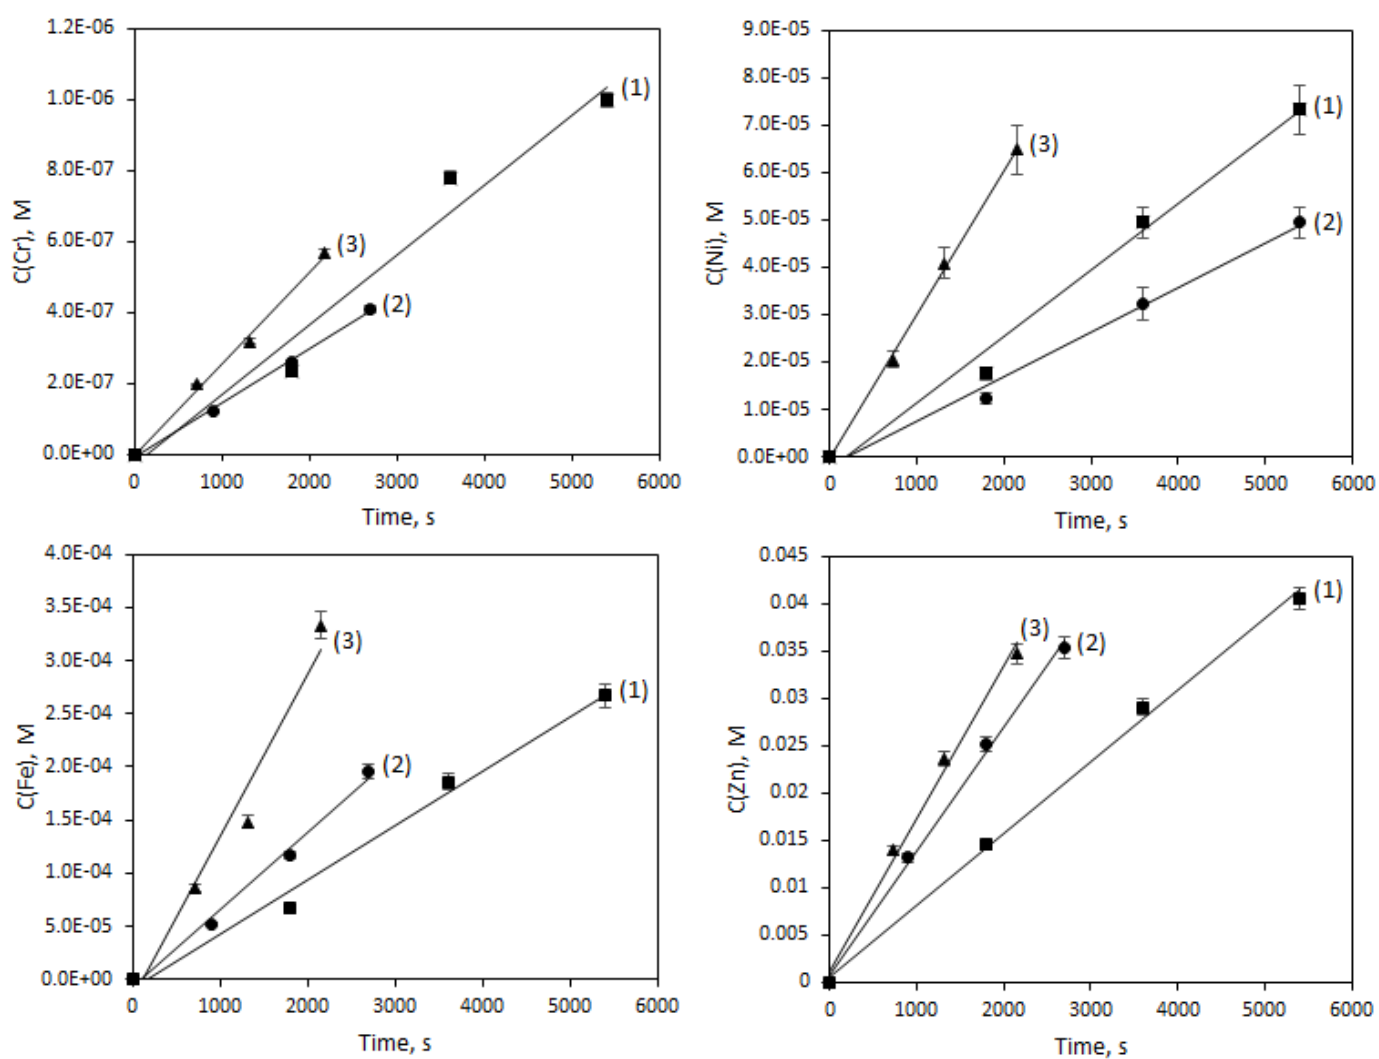

**Figure S1.** The concentration of metals in the dialysate chamber versus time during batch dialysis of feed solution.
